# Supplementary material for: The Impact of Microorganisms on Canine Semen Quality
Source: MDPI journal article supplement (doi:10.3390/ani14091267), 2024-04-23
Supplement: s1 [file s1]

Table S1. Breeds of dogs of the study population

| Breed                                 | Number of dogs | Percentage |
|---------------------------------------|----------------|------------|
| Crossbreed                            | 3              | 4.8        |
| Pedigree                              | 60             | 95.2       |
| Border Collie                         | 6              | 10.0       |
| Springer Spaniel                      | 3              | 5.0        |
| English Mastiff                       | 3              | 5.0        |
| Bernese Mountain Dog                  | 2              | 3.3        |
| Polish Lowland Sheepdog               | 2              | 3.3        |
| Dandie Dimond Terrier                 | 2              | 3.3        |
| German Shepherd                       | 2              | 3.3        |
| Nova Scotia Duck<br>Tolling Retriever | 2              | 3.3        |
| Lagotto Romagnolo                     | 2              | 3.3        |
| Whippet                               | 2              | 3.3        |
| Briard                                | 2              | 3.3        |
| Belgian Shepherd                      | 2              | 3.3        |
| Boston Terrier                        | 2              | 3.3        |
| Labrador Retriever                    | 2              | 3.3        |
| Sheltie                               | 1              | 1.7        |
| American Staffordshire Terrier        | 1              | 1.7        |
| Papillon                              | 1              | 1.7        |
| Brussels Griffon                      | 1              | 1.7        |
| Samoyed                               | 1              | 1.7        |
| Appenzeller                           | 1              | 1.7        |
| Shiba Inu                             | 1              | 1.7        |
| White Swiss Shepherd                  | 1              | 1.7        |
| Pitbull                               | 1              | 1.7        |
| Small Münsterländer                   | 1              | 1.7        |
| Miniature Schnauzer                   | 1              | 1.7        |
| Miniature Dachshund                   | 1              | 1.7        |
| Thai Ridgeback                        | 1              | 1.7        |
| Boxer                                 | 1              | 1.7        |
| Miniature Spitz                       | 1              | 1.7        |
| Dachshund                             | 1              | 1.7        |
| Pug                                   | 1              | 1.7        |
| Flat coated retriever                 | 1              | 1.7        |
| Golden Retriever                      | 1              | 1.7        |
| German Shorthaired Pointer            | 1              | 1.7        |
| Beagle                                | 1              | 1.7        |
| Polish Hound                          | 1              | 1.7        |
| Polish Tatra Sheepdog                 | 1              | 1.7        |
| Great Dane                            | 1              | 1.7        |
| Welsh Corgi Pembroke                  | 1              | 1.7        |
| Chinese Crested Dog                   | 1              | 1.7        |

Table S2. Demographic and hormonal characteristics of dogs from *Mycoplasma*-positive and *Mycoplasma*-negative group

| Characteristics <sup>a</sup>       | <i>Mycoplasma</i> -positive (n = 38) | <i>Mycoplasma</i> -negative (n = 25) | p-value |
|------------------------------------|--------------------------------------|--------------------------------------|---------|
| <b>Demographic characteristics</b> |                                      |                                      |         |
| Pedigree <sup>b</sup>              | 36 (94.7%)                           | 24 (96.0%)                           | 0.999   |
| Age [years]                        | 2.3, 1.5 – 4.0 (1.0 – 8.0)           | 3.5, 2.0 – 6.0 (1.0 – 8.0)           | 0.078   |
| Body weight [kg]                   | 22, 11 – 30 (3 – 120)                | 25, 16 – 34 (4.4 – 53)               | 0.779   |
| <b>Hormones</b>                    |                                      |                                      |         |
| Estradiol [pg/ml]                  | 11.3, 5.0 – 17.8 (<9 – 47.2)         | 13.1, 5.0 – 16.0 (<9 – 40.0)         | 0.662   |
| Testosterone [ng/ml]               | 4.0, 2.8 – 5.7 (1.0 – 12.0)          | 3.7, 1.6 – 5.6 (1.0 – 9.6)           | 0.357   |
| Total thyroxin [nmol/l]            | 26.0, 18.6 – 30.7 (3.0 – 56.5)       | 25.0, 17.8 – 32.8 (11.0 – 40.0)      | 0.961   |

<sup>a</sup> presented as the median, interquartile range and range and compared using the Mann-Whitney U test unless otherwise stated

<sup>b</sup> presented as the count and percentage and compared using the Fisher exact test

Table S3. Influence of the presence of *Mycoplasma* in the semen on semen characteristics

| Semen characteristics                         | <i>Mycoplasma</i> -positive (n = 38 or 37)<br><sup>a)</sup> |                                  | <i>Mycoplasma</i> -negative (n = 25) |                                    | p-value |
|-----------------------------------------------|-------------------------------------------------------------|----------------------------------|--------------------------------------|------------------------------------|---------|
|                                               | Median                                                      | Interquartile range<br>(Range)   | Median                               | Interquartile range<br>(Range)     |         |
| Semen volume [ml]                             | 2.4                                                         | 1.5 – 3.0<br>(0.6 – 5.0)         | 2.5                                  | 1.5 – 4.0<br>(0.4 – 5.0)           | 0.707   |
| pH                                            | 6.0                                                         | 6.0 – 6.5<br>(5.0 – 7.5)         | 6.0                                  | 6.0 – 6.5<br>(3.0 – 7.5)           | 0.671   |
| Sperm concentration<br>[×10 <sup>6</sup> /ml] | 361.3                                                       | 223.7 – 615.3<br>(42.2 – 1649.3) | 370.2                                | 185.7 – 513.2<br>(45.3 – 822.1)    | 0.358   |
| Total sperm number<br>[×10 <sup>6</sup> ]     | 734.6                                                       | 461.6 – 1260<br>(159.5 – 3298.7) | 570.2                                | 328.9 – 1401.7<br>(113.4 – 2093.6) | 0.295   |
| Azoospermia /<br>Oligospermia <sup>b</sup>    | 4 / 38 (10.5%)                                              |                                  | 2 / 25 (8.0%)                        |                                    | 0.999   |
| Round cell count<br>[×10 <sup>6</sup> /ml]    | 1.0                                                         | 0.5 – 3.0<br>(0 – 9.8)           | 0.9                                  | 0.3 – 3.0<br>(0 – 17.7)            | 0.790   |
| <b>Sperm morphology</b>                       |                                                             |                                  |                                      |                                    |         |
| Normal spermatozoa<br>[%]                     | 93.5                                                        | 87.5 – 95.0<br>(58.5 – 98.5)     | 0.9                                  | 89.0 – 95.0<br>(62.0 – 99.0)       | 0.943   |
| Head abnormalities<br>[%]                     | 1.5                                                         | 1.0 – 3.0<br>(0 – 18.0)          | 2.0                                  | 1.0 – 4.0<br>(0 – 5.5)             | 0.994   |
| Midpiece abnormalities [%]                    | 2.0                                                         | 1.5 – 3.5<br>(0 – 9.0)           | 2.0                                  | 1.5 – 3.5<br>(0 – 20)              | 0.943   |
| Tail abnormalities [%]                        | 2.0                                                         | 1.0 – 6.0<br>(0 – 29.5)          | 3.0                                  | 1.0 – 4.0<br>(0 – 13)              | 0.880   |
| Abnormal spermatozoa [%]                      | 6.5                                                         | 5.0 – 12.5<br>(1.5 – 41.5)       | 7.5                                  | 5.0 – 11.0<br>(1.0 – 38)           | 0.943   |
| <b>Sperm motility</b>                         |                                                             |                                  |                                      |                                    |         |
| Total motility [%]                            | 93.3                                                        | 88.0 – 96.5<br>(34.4 – 98.6)     | 93.8                                 | 87.7 – 95.6<br>(68.8 – 99.8)       | 0.977   |
| Progressive motility<br>[%]                   | 28.8                                                        | 20.4 – 39.0<br>(0.7 – 55.9)      | 35.0                                 | 25.1 – 40.9<br>(9.1 – 54.9)        | 0.162   |

|                                 |      |                              |      |                              |       |
|---------------------------------|------|------------------------------|------|------------------------------|-------|
| Medium-progressive motility [%] | 33.9 | 26.0 – 47.8<br>(4.6 – 71.2)  | 30.9 | 26.7 – 42.2<br>(8.9 – 78.7)  | 0.430 |
| Non-progressive motility [%]    | 23.6 | 17.1 – 29.5<br>(10.3 – 49.5) | 23.5 | 19.6 – 29.3<br>(5.1 – 38.6)  | 0.698 |
| Spherical tracks [%]            | 43.8 | 31.8 – 55.4<br>(1.2 – 78.7)  | 36.2 | 30.1 – 46.5<br>(16.0 – 83.7) | 0.251 |
| Rapid motility [%]              | 58.5 | 44.7 – 70.2<br>(3.7 – 86.1)  | 55.1 | 48.3 – 67.0<br>(29.8 – 94.2) | 0.954 |
| Medium motility [%]             | 24.1 | 18.5 – 31.7<br>(7.2 – 48.6)  | 25.2 | 17.6 – 30.3<br>(5.1 – 53.4)  | 0.920 |
| Slow motility [%]               | 7.0  | 3.9 – 10.9<br>(0.7 – 38.8)   | 6.9  | 5.0 – 10.7<br>(0.5 – 35.7)   | 0.977 |
| Mucus penetration [%]           | 29.7 | 20.8 – 41.1<br>(2.4 – 64.9)  | 32.5 | 20.7 – 39.4<br>(4.2 – 50.5)  | 0.869 |
| Viability [%]                   | 92.0 | 88.0 – 94.0<br>(40.0 – 97.0) | 91.0 | 87.0 – 95.0<br>(54.0 – 98.5) | 0.863 |
| <b>Bacterial coinfection</b>    |      |                              |      |                              |       |
| Bacteria in semen <sup>b</sup>  |      | 6 / 38<br>(15.8%)            |      | 2 / 25<br>(8.0%)             | 0.461 |

<sup>a</sup> sperm characteristics for 62 dogs which had sperms in semen

<sup>b</sup> presented as the count and percentage and compared using the Fisher exact test
